# Supplementary material
Source: PubMed Central journal article supplement (PMC6726529)
Supplement: NIHMS1526988-supplement-1.pdf [file NIHMS1526988-supplement-1.pdf]

Supplementary Fig. S2



# Supplementary Fig. S3



Supplementary Fig. S4

A.



B.



## Supplementary Fig. S5

HDAC9  
GPC2  
TMED4  
ARL6IP4  
RCBTB2  
NARG2  
ATG4D  
MBD3  
SIVA1  
AHCY  
E2F1  
SPC24  
KBTBD6  
MCM2  
UQCR11  
ALKBH4  
C15orf39  
POLR2J  
ZKSCAN5  
TBRG4  
POLD2  
MCM7  
SRSF9  
NAA16  
HMG20A  
POLR2L  
CEP41  
HCFC1  
LINC00657  
GPSM3  
GNB5  
CLDN14  
VMP1  
MYO10  
TGFBR3  
DISC1FP1  
JAK1  
KCND3  
HCG22  
IFNK  
TNFSF14  
SGMS2  
ERVV-1  
BDNF  
CADPS2  
PROS1  
PTHLH  
OSBPL6  
NTRK2  
RHCG  
SH3GL2  
FLJ33360  
KIAA1244  
GAS2L3  
EGR2  
ELF5  
DUSP2  
SLCO5A1  
ASTL  
CD226  
DOK6  
ZNF267  
ANO3  
NCALD  
TIGIT  
OR2V2  
PRRG4  
ENPP6  
PITPNC1

# Supplementary Fig. S6



## Supplementary Fig. S7
